# Supplementary material for: Potential-based thermodynamics with consistent conservative cascade transport for implicit large eddy simulation: PTerodaC 3 TILES version 1.0
Source: Copernicus journal article supplement (doi:10.5194/gmd-18-3331-2025), 2025-06-06
Supplement: Supplementary file 1 [file gmd-18-3331-2025-supplement.zip]

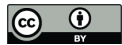

## *Supplement of*

# **Potential-based thermodynamics with consistent conservative cascade transport for implicit large eddy simulation: PTERODA<sup>3</sup>TILES version 1.0**

**John Thuburn**

*Correspondence to:* John Thuburn (j.thuburn@exeter.ac.uk)

- gmd-18-3331-2025-supplement-title-page.pdf
- SupplementaryMaterials
  - Manuscript\_figures\_Matlab
    - \* ARM\_cloud\_frac\_from\_column.m
    - \* ARM\_cloud\_top.m
    - \* ARM\_convergencediags.m
    - \* ARM\_globaldiags.m
    - \* ARM\_time\_ave\_column.m
    - \* BOMEX\_time\_ave\_column.m
    - \* BOMEX\_time\_series.m
    - \* DYCOMS\_cloud\_frac\_from\_column.m
    - \* DYCOMS\_cloud\_top.m
    - \* DYCOMS\_time\_series.m
    - \* name2code.m
    - \* read\_a\_column.m
    - \* retrieve\_field.m
  - Manuscript\_namelist
    - \* ARM\_nml.in
    - \* BOMEX\_nml.in
    - \* DYCOMS\_nml.in
  - ReadMe.txt

The copyright of individual parts of the supplement might differ from the article licence.
